# Supplementary material for: Role of the NaHCO3 Transporter MpsABC in the NaHCO3–β-Lactam-Responsive Phenotype in Methicillin-Resistant Staphylococcus aureus
Source: PubMed Central journal article supplement (PMC10269494; doi:10.1128/spectrum.00141-23), 2023-04-27
Supplement: spectrum.00141-23-s0001.pdf [file spectrum.00141-23-s0001.pdf]

## SUPPLEMENTARY MATERIALS

### **Role of the MpsABC NaHCO<sub>3</sub> transporter in the NaHCO<sub>3</sub>-β-lactam-responsive phenotype in methicillin-resistant *Staphylococcus aureus* (MRSA)**

Sook-Ha Fan,<sup>a,#</sup> Richard A. Proctor,<sup>b,c</sup> Selvi C. Ersoy,<sup>a</sup> Adhar C. Manna,<sup>d</sup> Ambrose L. Cheung,<sup>d</sup> Friedrich Goetz,<sup>e</sup> Henry F. Chambers,<sup>f</sup> and Arnold S. Bayer<sup>a,g,#</sup>

SUPPLEMENTARY FIGURES

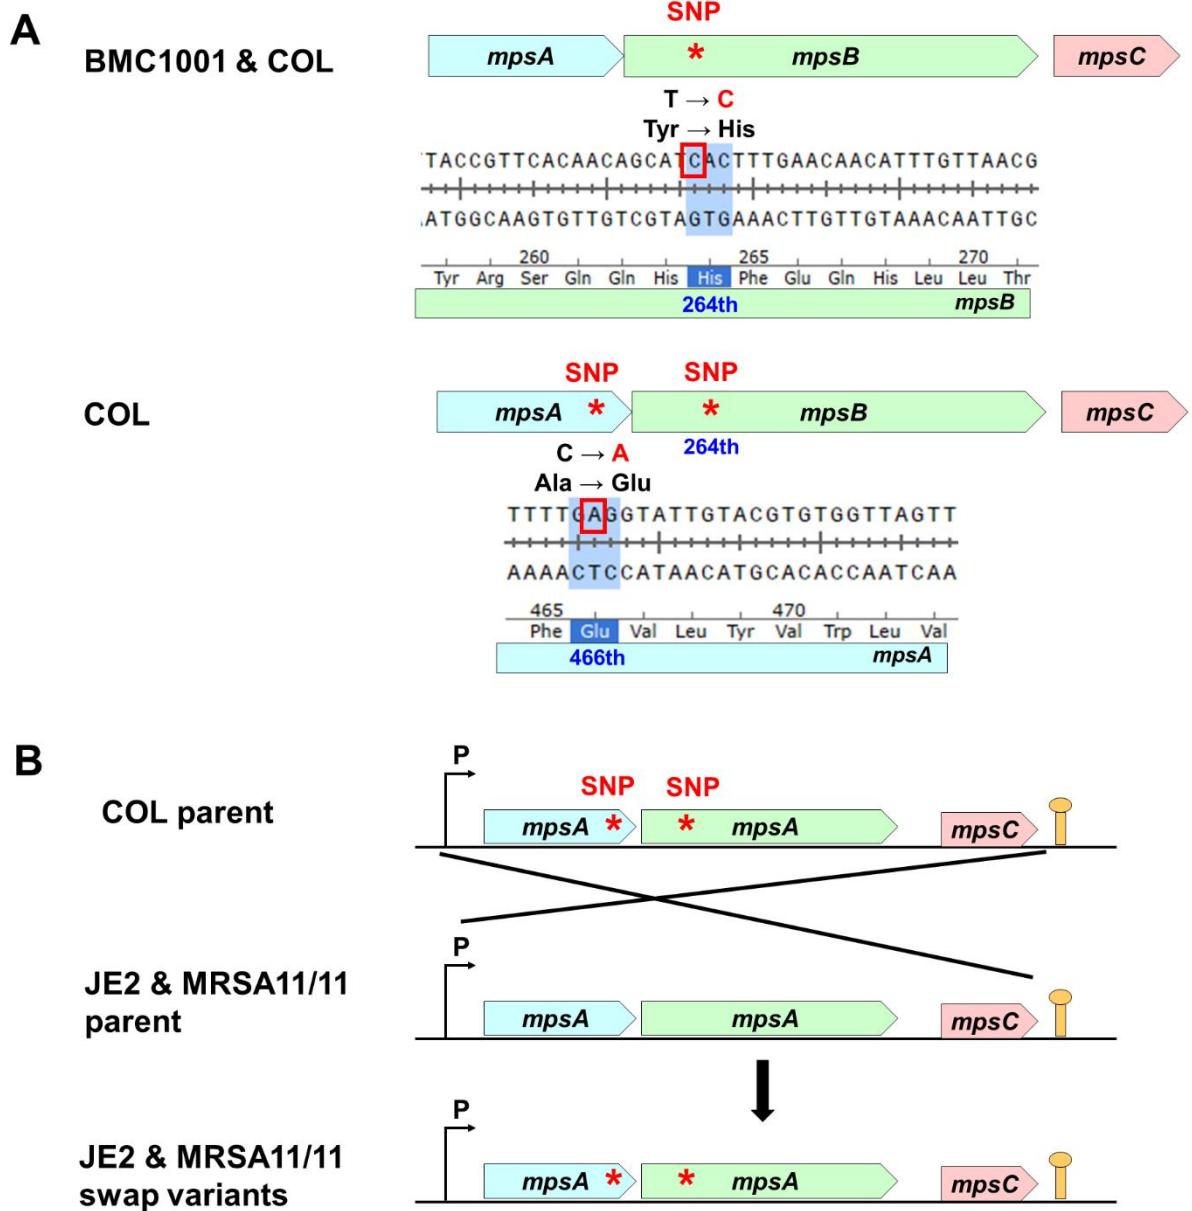

**Supplementary Figure 1: (A)** In both *S. aureus* BMC1001 and COL (NaHCO<sub>3</sub>-nonresponsive MRSA strains), there is a nucleotide change or Single Nucleotide Polymorphism (SNP, marked with \*) from T-to-C in the coding region of *mpsB*, causing a change in the 264<sup>th</sup> amino acid position of MpsB from tyrosine to histidine. In COL, there

is an additional nucleotide change, from C-to-A resulting in the change in the 466<sup>th</sup> amino acid of MpsA from alanine to glutamic acid. **(B)** The SNPs were introduced into the responsive strains by “swapping” the *mpsABC* region from COL to JE2 and MRSA 11/11 via recombination or two-point cross-over, generating JE2 and MRSA 11/11 swap variants which harbor both the SNPs.

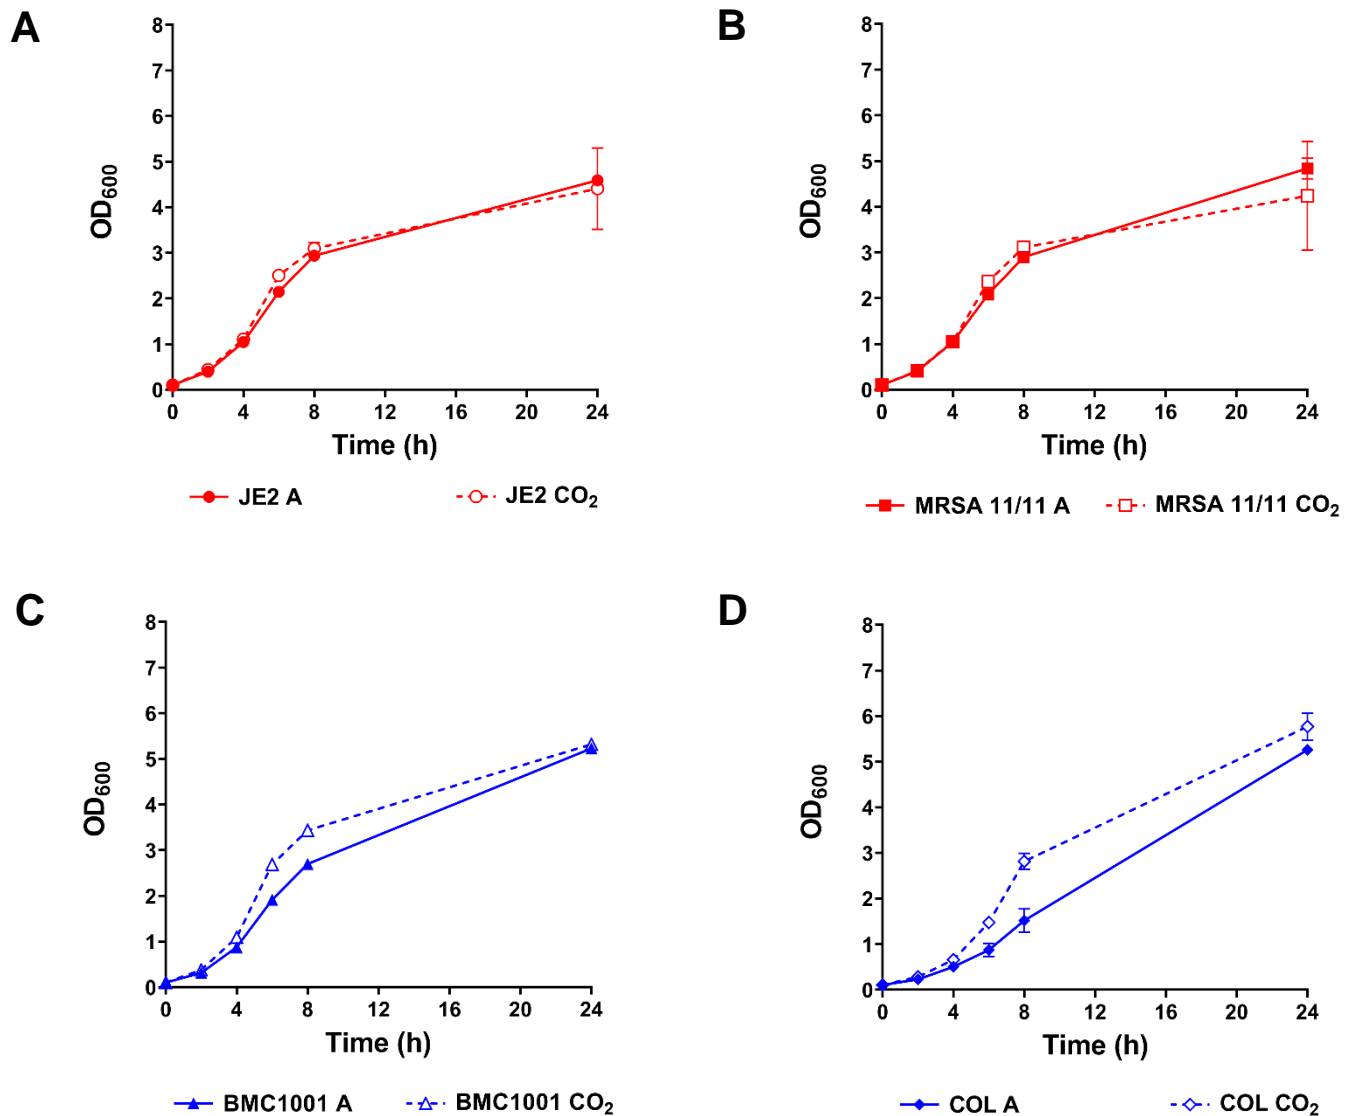

**Supplementary Figure 2:** Growth curves of *S. aureus* **(A)** JE2; **(B)** MRSA 11/11; **(C)** BMC 1001 and **(D)** COL in ambient air (A, solid lines) and 5% CO<sub>2</sub> conditions (CO<sub>2</sub>, dashed lines). Strains were grown in cation-adjusted Mueller-Hinton Broth (CA-MHB) plus Tris. Data shown are mean  $\pm$  standard deviation (SD) from two independent biological replicates.

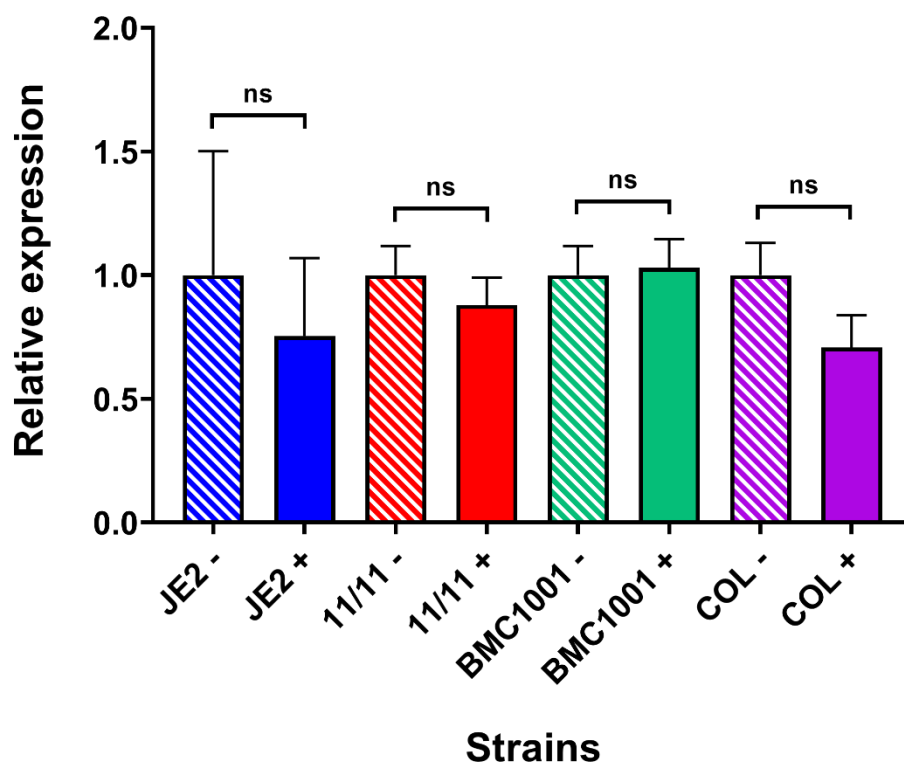

**Supplementary Figure 3:** Gene expression data in NaHCO<sub>3</sub>-responsive (JE2 and MRSA11/11) and non-responsive strains (BMC1001 and COL) as a control to evaluate if oxacillin alone affects the expression of *mpsA*. Data were obtained by qRT-PCR of RNA from mid-exponential phase (3h) strains grown in cation-adjusted Mueller-Hinton Broth (CA-MHB) plus Tris with (+) or without (-) ½ MIC of oxacillin. 2% NaCl was included in growth media in which oxacillin was also included. For each strain, *mpsA* expression was normalized to the value obtained in CA-MHB-Tris (-), with this value set equal to 1.0. There was no significant difference (ns) between those grown with or without oxacillin for all the strain sets, as calculated by Student's *t* test. Data shown are mean ± standard deviation (SD) from two independent biological replicates, performed in duplicate for each strain/condition.

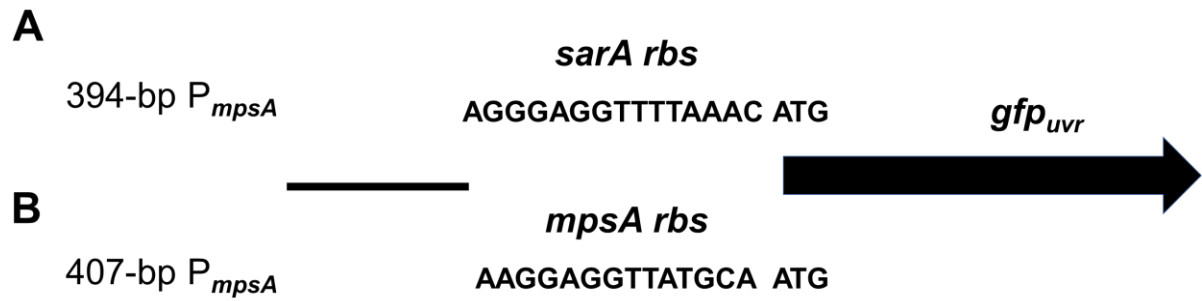

**Supplementary Figure 4:** Schematic of transcriptional and translational reporter fusions of *mpsA* promoter with **(A)** *sarA* RBS and **(B)** *mpsA* with its own RBS fused to *gfp<sub>uvr</sub>* reporter gene.

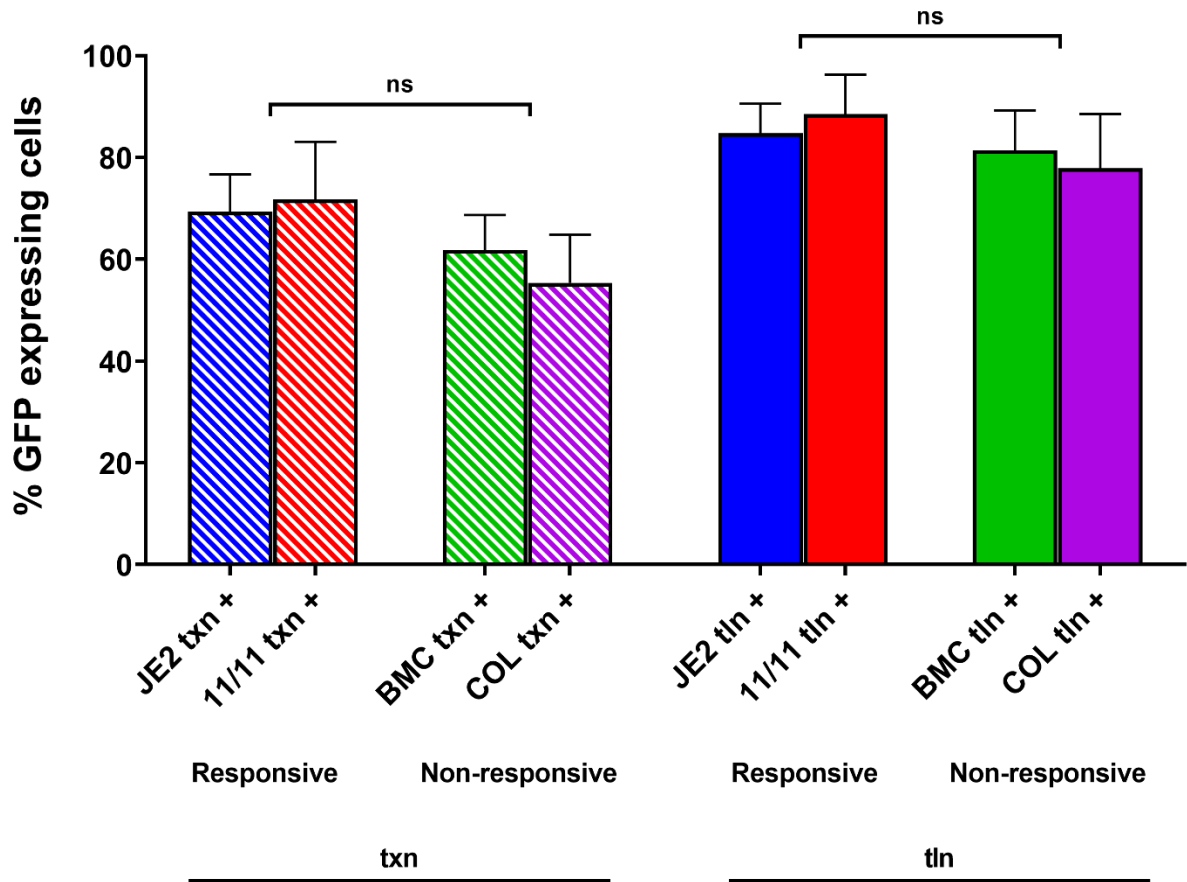

**Supplementary Figure 5:** Percentage of GFP expressing cells out of a total population of 10000 cells) following growth for 3 h in cation-adjusted Mueller-Hinton Broth (CA-MHB) plus Tris + 2% NaCl, ½ MIC oxacillin with NaHCO<sub>3</sub> (+). Average of GFP expressing cells (JE2, MRSA 11/11, BMC 1001, and COL) assessed by flow cytometry in transcriptional (txn) constructs (left) and in translational (tln) constructs (right). The constructs and conditions used are detailed in Materials & Methods. There was no significant difference (ns) in the percentage GFP expressing cells between the responsive (JE2 and MRSA 11/11) and non-responsive (BMC 1001 and COL) strains were determined by Student's *t* test). Data shown are the results of four independent biological replicates for each strain/condition.

**A**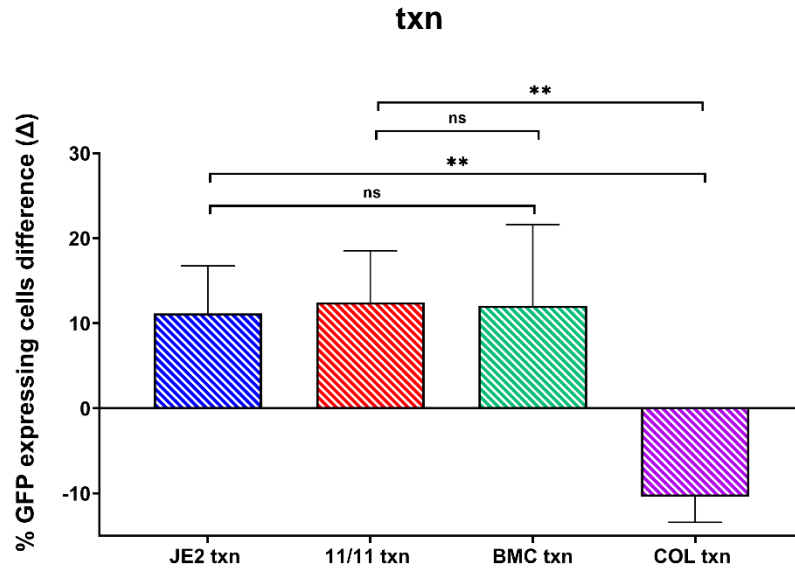**B**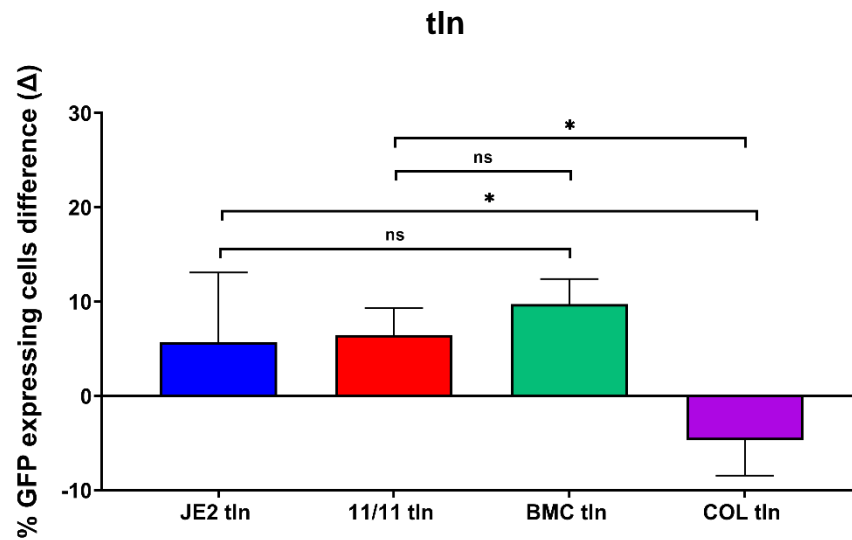

**Supplementary Figure 6:** Percentage of GFP expressing cells difference ( $\Delta$ ) of the strains JE2, MRSA 11/11, BMC1001 and COL grown with and without  $\text{NaHCO}_3$  in the presence of  $\frac{1}{2}$  MIC oxacillin for **(A)** transcriptional (txn) and **(B)** translational (tlm) constructs. The constructs and conditions used are detailed in Materials & Methods. Each bar shows the difference (increase/decrease) between the percentage of GFP expressing



cells of strain grown with and without  $\text{NaHCO}_3$  (baseline levels) and the statistical significance between them were calculated using one-way ANOVA followed by Tukey's multiple comparison test. ( $p > 0.05$ , not significant, ns;  $p < 0.05$  \*;  $p < 0.01$  \*\*). Data shown are the results of four independent biological replicates for each strain/condition.

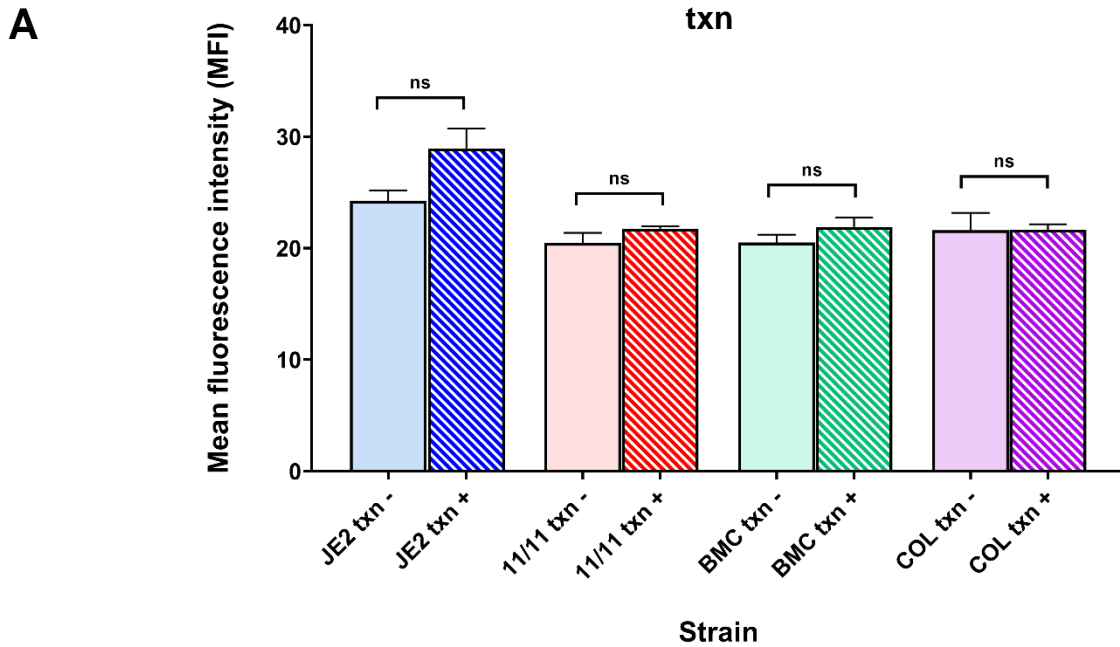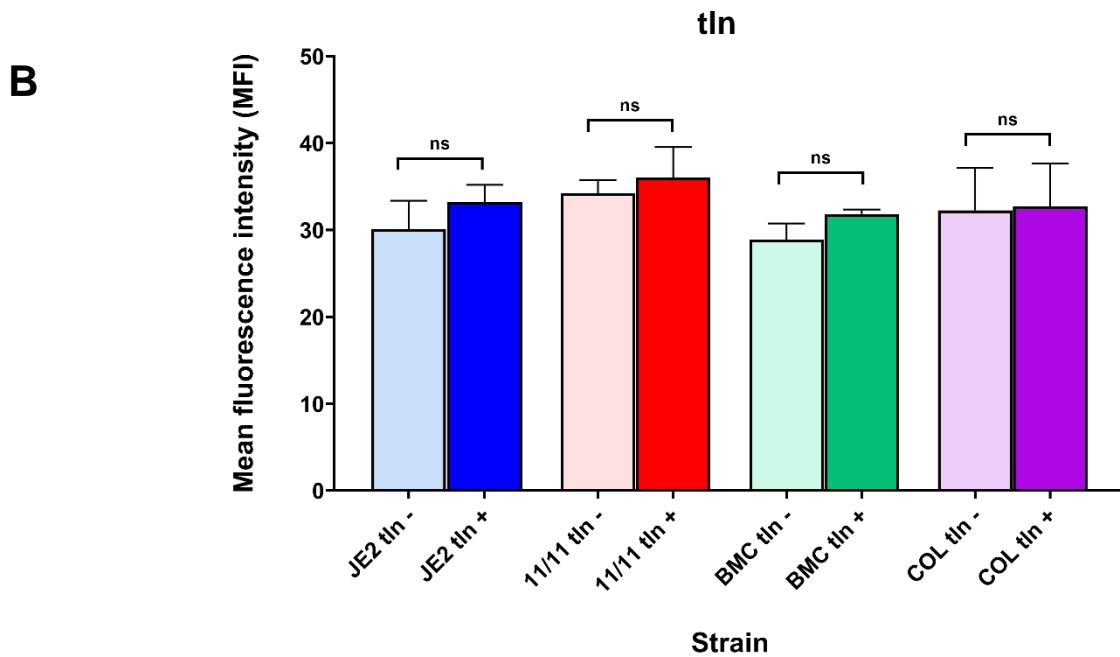

**Supplementary Figure 7:** Mean fluorescence intensity (MFI) out of a total population of 10000 cells) following growth for 3 h in cation-adjusted Mueller-Hinton Broth (CA-MHB) plus Tris with (+) or without (-)  $\frac{1}{2}$  MIC of oxacillin as a control to evaluate if oxacillin alone affects the transcriptional and translational efficiency of the promoter-GFP fusions

constructs. The constructs and conditions used are detailed in Materials & Methods. 2% NaCl was included in growth media in which oxacillin was also included. **(A)** MFI of the cells (JE2, MRSA 11/11, BMC 1001, and COL) as assessed by flow cytometry in transcriptional (txn) constructs and **(B)** in translational (tln) constructs. There was no significant difference (ns) in the MFI between those grown with or without oxacillin for both the txn and tln constructs, as determined by Student's *t* test. Data shown are mean  $\pm$  standard deviation (SD) from two independent biological replicates, each with three technical replicates.

**A**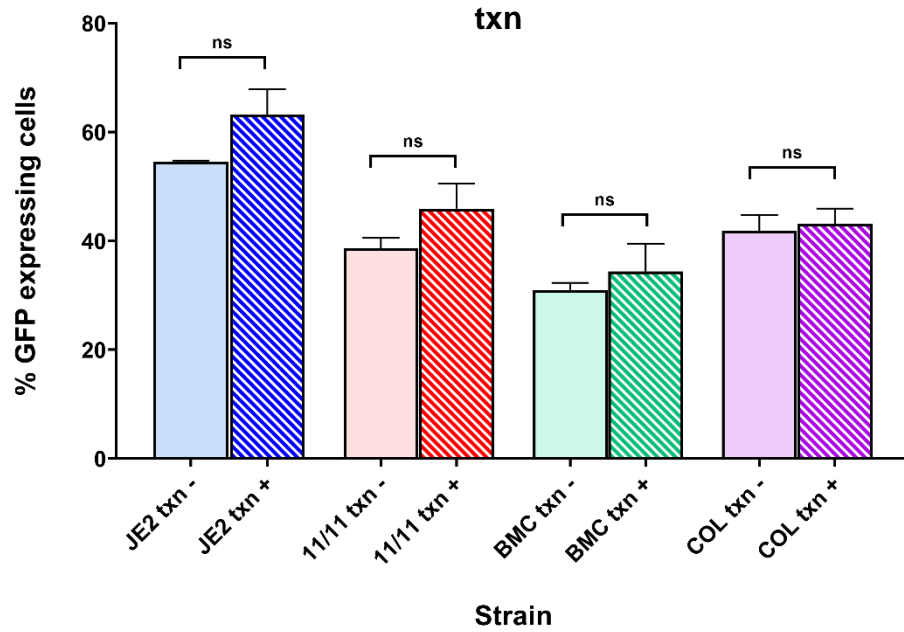**B**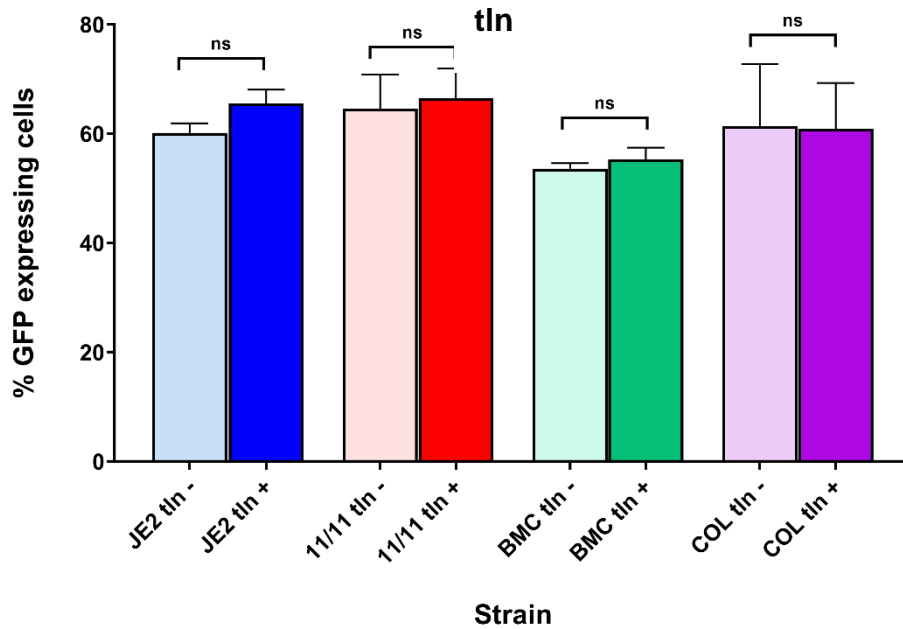

**Supplementary Figure 8:** Percentage of GFP expressing cells out of a total population of 10000 cells) following growth for 3 h in cation-adjusted Mueller-Hinton Broth (CA-MHB) plus Tris with (+) or without (-) 1/2 MIC of oxacillin as a control to evaluate if oxacillin alone affects the transcriptional and translational efficiency of the promoter-GFP fusions

constructs. 2% NaCl was included in growth media in which oxacillin was also included. The constructs and conditions used are detailed in Materials & Methods. **(A)** Average of GFP expressing cells (JE2, MRSA 11/11, BMC 1001, and COL) as assessed by flow cytometry in transcriptional (txn) constructs and **(B)** in translational constructs. There was no significant difference (ns) in the percentage of GFP expressing cells between those grown with or without oxacillin for both the txn and tln constructs, as determined by Student's *t* test. Data shown are mean  $\pm$  standard deviation (SD) from two independent biological replicates, each with three technical replicates.

## SUPPLEMENTARY TABLES

**Supplementary Table 1: Minimum inhibitory concentrations (MICs) of oxacillin in JE2 and MRSA11/11 swap variants**

| Strains                 | Oxacillin ( $\mu\text{g/mL}$ ) |                                         |
|-------------------------|--------------------------------|-----------------------------------------|
|                         | Ambient air                    |                                         |
|                         | CA-MHB Tris                    | CA-MHB Tris +<br>44 mM $\text{NaHCO}_3$ |
| <b>Swap variants</b>    |                                |                                         |
| JE2 swap variant        | 64                             | 2                                       |
| MRSA 11/11 swap variant | 64                             | 2                                       |
| <b>Responsive</b>       |                                |                                         |
| JE2 parent              | 64                             | 1                                       |
| MRSA 11/11 parent       | 32                             | 0.5                                     |
| <b>Non-responsive</b>   |                                |                                         |
| COL parent              | 256                            | 512                                     |

**Supplementary Table 2: Bacterial strains used in the study**

| Strains                                                            | Descriptions                                                                                            | Reference  |
|--------------------------------------------------------------------|---------------------------------------------------------------------------------------------------------|------------|
| <b><i>Staphylococcus aureus</i></b>                                |                                                                                                         |            |
| <b>For the construction of <i>mpsABC</i> deletion mutants</b>      |                                                                                                         |            |
| <i>S. aureus</i> JE2<br>(parent)                                   | <i>S. aureus</i> USA 300 FPR375 derivative, cured<br>of three plasmids                                  | (1)        |
| <i>S. aureus</i> JE2<br>$\Delta mpsABC$                            | <i>S. aureus</i> JE2 $\Delta mpsABC$ (deletion of<br>SAUSA300_0425, SAUSA300_0426 and<br>SAUSA300_0426) | (2)        |
| <i>S. aureus</i> JE2<br>$\Delta mpsABC$ (pRB473<br><i>mpsABC</i> ) | <i>S. aureus</i> JE2 $\Delta mpsABC$ complemented with<br><i>mpsABC</i>                                 | (2)        |
| MRSA 11/11 (parent)                                                | Daptomycin non-susceptible methicillin-resistant <i>S.</i><br><i>aureus</i> USA 300 isolate             | (3)        |
| MRSA 11/11<br>$\Delta mpsABC$                                      | MRSA 11/11 $\Delta mpsABC$ (deletion of <i>mpsA</i> , <i>mpsB</i><br>and <i>mpsC</i> )                  | This study |
| MRSA 11/11<br>$\Delta mpsABC$ (pRB473<br><i>mpsABC</i> )           | MRSA 11/11 $\Delta mpsABC$ complemented with<br><i>mpsABC</i>                                           | This study |
| BMC1001 (parent)                                                   | Clinical bloodstream isolate                                                                            | (4)        |
| BMC1001 $\Delta mpsABC$                                            | <i>S. aureus</i> $\Delta mpsABC$ (deletion of <i>mpsA</i> , <i>mpsB</i> and<br><i>mpsC</i> )            | This study |

|                                                    |                                                                                       |            |
|----------------------------------------------------|---------------------------------------------------------------------------------------|------------|
| BMC1001 $\Delta mpsABC$<br>(pRB473 <i>mpsABC</i> ) | BMC1001 $\Delta mpsABC$ complemented with <i>mpsABC</i>                               | This study |
| COL (parent)                                       | A representative member of an early MRSA lineage first identified in the 1960s        | (5)        |
| COL $\Delta mpsABC$                                | <i>S. aureus</i> COL $\Delta mpsABC$ (deletion of SACOL0494, SACOL0494 and SACOL0494) | This study |
| COL $\Delta mpsABC$<br>(pRB473 <i>mpsABC</i> )     | <i>S. aureus</i> COL $\Delta mpsABC$ complemented with <i>mpsABC</i>                  | This study |

#### **For the construction of GFP reporter strains**

|                  |                                                                                                                                         |            |
|------------------|-----------------------------------------------------------------------------------------------------------------------------------------|------------|
| Plasmid pALC1484 | Vector for promoterless <i>gfp</i> reporter gene ( <i>gfp<sub>uvr</sub></i> , <i>chlor<sup>R</sup></i> )                                | (6)        |
| ALC9475          | JE2 (pALC1484 with 394-bp promoter region of the <i>mpsA</i> gene with the <i>sarA</i> ribosome binding site before <i>gfp</i> gene).   | This study |
| ALC9476          | MRSA11/11 (pALC1484 with 394-bp promoter region of <i>mpsA</i> gene with the <i>sarA</i> ribosome binding site before <i>gfp</i> gene). | This study |
| ALC9477          | BMC1001 (pALC1484 with 394-bp promoter region of <i>mpsA</i> gene with the <i>sarA</i> ribosome binding site before <i>gfp</i> gene).   | This study |



|         |                                                                                                                                   |            |
|---------|-----------------------------------------------------------------------------------------------------------------------------------|------------|
| ALC9478 | COL (pALC1484 with 394-bp promoter region of <i>mpsA</i> gene with the <i>sarA</i> ribosome binding site before <i>gfp</i> gene). | This study |
| ALC9410 | BMC1001 with the empty plasmid (pALC1484)                                                                                         | This study |
| ALC9414 | MRSA11/11 with the empty plasmid (pALC1484)                                                                                       | This study |
| ALC9418 | COL with the empty plasmid (pALC1484)                                                                                             | This study |
| ALC9485 | JE2 with the empty plasmid (pALC1484)                                                                                             | This study |
| ALC9479 | JE2 (pALC1484 with 407-bp <i>mpsA</i> promoter region with <i>mpsA</i> ribosome binding site before <i>gfp</i> gene).             | This study |
| ALC9480 | MRSA 11/11 (pALC1484 with 407-bp <i>mpsA</i> promoter region with <i>mpsA</i> ribosome binding site before <i>gfp</i> gene).      | This study |
| ALC9481 | BMC1001 (pALC1484 with 407-bp <i>mpsA</i> promoter region with <i>mpsA</i> ribosome binding site before <i>gfp</i> gene).         | This study |
| ALC9482 | COL (pALC1484 with 407-bp <i>mpsA</i> promoter region with <i>mpsA</i> ribosome binding site before <i>gfp</i> gene).             | This study |

**For the construction of SNP swap variants**

|         |                                                      |            |
|---------|------------------------------------------------------|------------|
| ALC9556 | JE2 with COL <i>mpsAB</i> region swap variant        | This study |
| ALC9557 | MRSA 11/11 with COL <i>mpsAB</i> region swap variant | This study |

---

**Supplementary Table 3: Oligonucleotides used in this study**

| <b>Primer name</b>                                            | <b>Sequence (5'→3')</b>                                  |
|---------------------------------------------------------------|----------------------------------------------------------|
| <b>For the construction of <i>mpsABC</i> deletion mutants</b> |                                                          |
| Upstream<br><i>mpsABC</i> Fwd                                 | AATTCCGGAGCTCGGTACCCTCCATGCTAAAAGGTTCAATG                |
| Upstream<br><i>mpsABC</i> rev                                 | TATCCTCAAGCTAATCTCTCGCATAATTGC                           |
| Downstream<br><i>mpsABC</i> fwd                               | GAGAGATTAGCTTGAGGATAATTTGGAAAAG                          |
| Downstream<br><i>mpsABC</i> fwd                               | ACAGATCTGCGCGCTAGCCCTGTGCACTTGTTTCATAG                   |
| <b>For the construction of reporter strains</b>               |                                                          |
| <i>mpsA</i> <i>EcoRI</i>                                      | AAGA AGA GAA TTC AAA AGG ACG GGA AAT ACT GCC TAA         |
| <i>mpsA</i> <i>XbaI</i>                                       | AGG AGAA TCT AGA TAAT CTC TCG CAT AAT TGC TTA TGT<br>ATA |
| <i>mpsA</i> rbs F                                             | AGGAGAATCTAGAAGGAGGTTATGCAATGATTAAGGAGAAG<br>AACTTTTCACT |
| 1484 <i>EcoRI</i>                                             | AGA GGA TCC CCG GGT ACC GA                               |
| <b>For qRT-PCR</b>                                            |                                                          |
| <i>mpsA</i> Fwd                                               | CACGTGAGTCTGCGAAATTA                                     |
| <i>mpsA</i> Rev                                               | CCGGTATCATGACAGCTAATAC                                   |
| <i>gyrB</i> Fwd                                               | CGCAGGCGATTTTACCATTA                                     |
| <i>gyrB</i> Rev                                               | GCTTTCGCTAGATCAAAGTCG                                    |

**For the construction of SNP swap variant**

*mpsAB* F      AAG AGA GGA TCC ATG AGT TAA CTT CAT TGT ACA TAG

TTA

*mpsAB* R      AAG AGA GGA TCC GAA GCT AGA ACA TTG TAG ATA TGA

TGA

*mpsAB* Verify F    GAG TTG GAC AAT GCC GAA GCG TGA

---

## Supplementary references

1. Fey PD, Endres JL, Yajjala VK, Widhelm TJ, Boissy RJ, Bose JL, Bayles KW. 2013. A genetic resource for rapid and comprehensive phenotype screening of nonessential *Staphylococcus aureus* genes. *mBio* 4:e00537-12.
2. Fan SH, Liberini E, Gotz F. 2021. *Staphylococcus aureus* Genomes Harbor Only MpsAB-Like Bicarbonate Transporter but Not Carbonic Anhydrase as Dissolved Inorganic Carbon Supply System. *Microbiol Spectr* 9:e0097021.
3. Murthy MH, Olson ME, Wickert RW, Fey PD, Jalali Z. 2008. Daptomycin non-susceptible methicillin-resistant *Staphylococcus aureus* USA 300 isolate. *J Med Microbiol* 57:1036-1038.
4. Yang SJ, Xiong YQ, Boyle-Vavra S, Daum R, Jones T, Bayer AS. 2010. Daptomycin-oxacillin combinations in treatment of experimental endocarditis caused by daptomycin-nonsusceptible strains of methicillin-resistant *Staphylococcus aureus* with evolving oxacillin susceptibility (the "seesaw effect"). *Antimicrob Agents Chemother* 54:3161-9.
5. Dyke KG. 1969. Penicillinase production and intrinsic resistance to penicillins in methicillin-resistant cultures of *Staphylococcus aureus*. *J Med Microbiol* 2:261-78.
6. Kahl BC, Goulian M, van Wamel W, Herrmann M, Simon SM, Kaplan G, Peters G, Cheung AL. 2000. *Staphylococcus aureus* RN6390 replicates and induces apoptosis in a pulmonary epithelial cell line. *Infect Immun* 68:5385-92.
